# Supplementary material
Source: publisher figshare collection journal article supplement (https://springernature.figshare.com/ndownloader/files/8251325)
Supplement: Supplementary file [file 8251325]

**Title:** Heterologous expression of a *Streptomyces cyaneus* laccase for biomass modification applications

**Supplementary Material**

**AMB Express**

**Authors:** Selin Ece<sup>1</sup>, Camilla Lambertz<sup>1</sup>, Rainer Fischer<sup>1,2</sup> and Ulrich Commandeur<sup>1\*</sup>

**Affiliations:**

<sup>1</sup> Institute for Molecular Biotechnology (Biology VII), RWTH Aachen University, Worringerweg 1, Aachen, 52074, Germany

<sup>2</sup> Fraunhofer Institute for Molecular Biology and Applied Ecology (IME), Forckenbeckstrasse 6, Aachen, 52074, Germany

\*Corresponding author: Institute for Molecular Biotechnology (Biology VII), RWTH Aachen University, Worringerweg 1, Aachen, 52074, Germany

E-mail: [ulrich.commandeur@molbiotech.rwth-aachen.de](mailto:ulrich.commandeur@molbiotech.rwth-aachen.de)

Phone: +49-241-80-28131

Fig. S1 Activity assays of ScLac before and after incubation with 0.5 mM CuSO<sub>4</sub>.

Fig. S2 Zymogram analysis of purified laccase expressed in *E. coli*.

## Supplementary figures

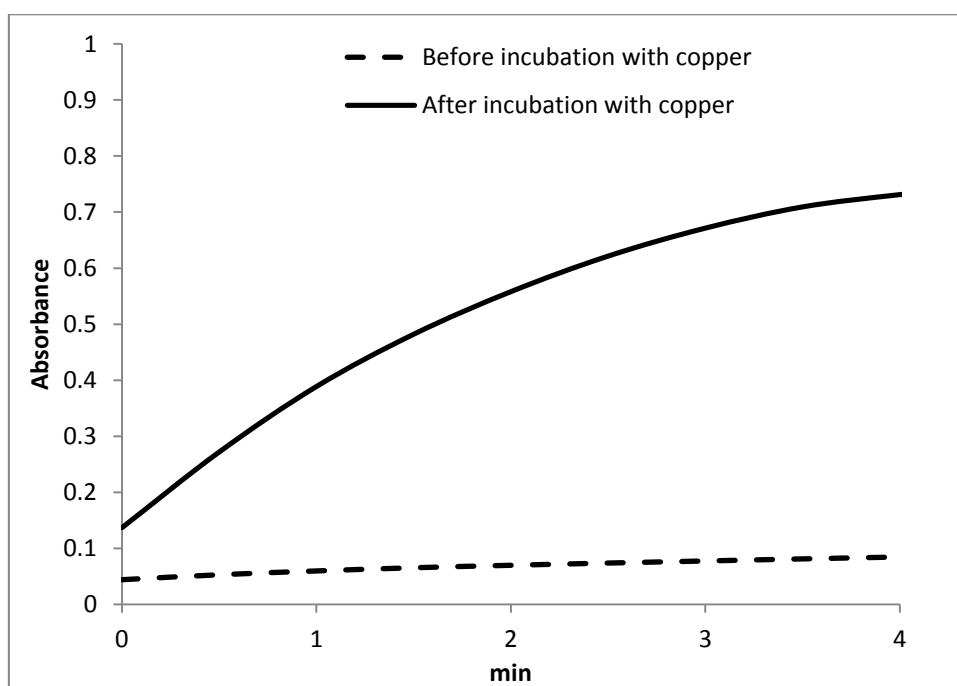

**Fig. S1** Activity assays of Sclac before (dashed line) and after (solid line) incubation with 0.5 mM  $\text{CuSO}_4$ . We used 0.4  $\mu\text{M}$  Sclac in the assays with DMP as the substrate. The reactions were followed for 4 min at 468 nm

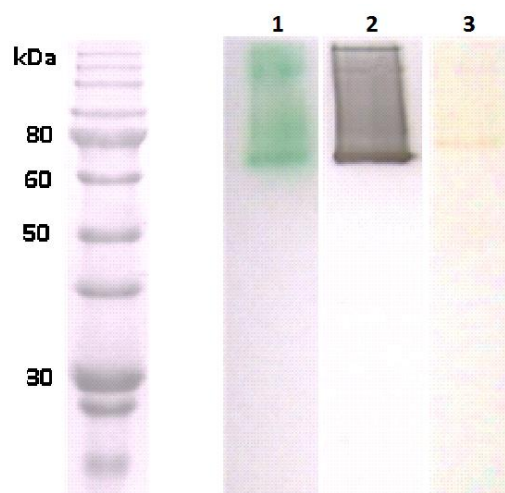

**Fig. S2** Zymogram analysis of purified laccase expressed in *E. coli*. Native protein gel electrophoresis was carried out using 5–12% native-PAGE Tris-glycine gels loaded with 25  $\mu$ g of laccase per lane. When the separation was completed, the gels were soaked in 10 mM ABTS (1), L-DOPA (2) or caffeic acid (3) prepared in 100 mM MES buffer (pH 5.5) and incubated at 37°C for 5 min. Reactions were stopped by exchanging the buffer with 1:1 ethanol-water (Ramachandra et al. 1987; Thomas et al. 1998). Molecular mass markers are shown on the left

## References

- Ramachandra M, Crawford DL, Pometto AL (1987) Extracellular enzyme-activities during lignocellulose degradation by *Streptomyces* Spp - A comparative-study of Wild-Type and genetically manipulated strains. Appl Environ Microbiol 53(12):2754-2760
- Thomas M, Barker G, Furness PN (1998) A semi-quantitative approach to in situ zymography using tissue sections. J Pathol 186:4a-4a
